# Supplementary material
Source: PubMed Central journal article supplement (PMC3666664)
Supplement: 1222031110_pnas.201222031SI.pdf [file 1222031110_pnas.201222031SI.pdf]

# Supporting Information

Schifano et al. 10.1073/pnas.1222031110

## SI Materials and Methods

**Strains, Plasmids, and Reagents.** All *Escherichia coli* liquid cultures were grown in M9 minimal medium supplemented with either 0.2% glucose or 0.1% glycerol at 37 °C, and the toxin was expressed from an arabinose-inducible promoter in pBAD33-*mazF-mt6* (“mt” refers to *Mycobacterium tuberculosis*). All *Mycobacterium smegmatis* and *Mycobacterium tuberculosis* liquid cultures were grown in 7H9 Middlebrook medium supplemented with 0.05% Tween 80, 0.5% bovine albumin, 0.2% glucose, and 0.085% NaCl, and the toxin was expressed from a tetracycline-inducible promoter in pMC1s-*mazF-mt6*. The working concentrations of ampicillin and chloramphenicol in *E. coli* were 100 and 25 µg/mL, respectively, whereas the concentration of kanamycin in *M. smegmatis* and *M. tuberculosis* was 25 µg/mL. The *mazF-mt6* (Rv1102c locus) and *mazE-mt6* (Rv1103c locus) genes were PCR-amplified with <sup>5</sup>NdeI/BamHI<sup>3</sup> ends from *M. tuberculosis* strain H37Rv genomic DNA to create pET-21c-*mazF-mt6* (1) and pET-28a-*mazE-mt6*, respectively. To create pBAD33-*mazF-mt6*, the pET-21c-*mazF-mt6* plasmid was digested with XbaI and HindIII to include the highly efficient T7 phage ribosome binding site, and the resulting fragment was cloned into pBAD33 (1). To create pColdTF-FT-*mazF-mt6* and pMC1s-*mazF-mt6*, pET-21c-*mazF-mt6* was digested with NdeI and BamHI, and the resulting fragment was cloned into pColdTF-FT (2) and pMC1s, respectively. The *ompF* (outer membrane porin F) and *fluF* genes were PCR-amplified from *E. coli* cultures with <sup>5</sup>NdeI/BamHI<sup>3</sup> ends to create pET-28a-*ompF* and pET-21c-*fluF*, respectively. Clones were confirmed by DNA sequence analysis.

**RNA Isolation.** Total RNA was isolated from *E. coli* strain BW25113Δ6 harboring pBAD33-*mazF-mt6*, from *M. smegmatis* strain mc<sup>2</sup>155 harboring pMC1s or strain *mj102* (RNase J deletion strain) harboring pMC1s-*mazF-mt6*, and from *M. tuberculosis* strain H37Rv, all grown to midlogarithmic phase. When *E. coli* cultures reached an OD<sub>600nm</sub> value between 0.3 and 0.4, the culture was split into equal portions, and arabinose was added to one portion to a final concentration of 0.2%. When *M. smegmatis* cultures reached an OD<sub>600nm</sub> value between 0.1 and 0.2, the culture was split into equal portions, and anhydrotetracycline was added to one portion to a final concentration of 100 ng/mL. RNA was extracted from *E. coli* using the hot phenol method as previously described (3) and from *M. smegmatis* and *M. tuberculosis* by resuspending cell pellets in TRIzol Reagent (Invitrogen). For *M. smegmatis* and *M. tuberculosis*, RNA was treated with TURBO DNase (Invitrogen) and further purified with an RNeasy cleanup kit (Qiagen).

**Analysis of Steady-State rRNA Levels.** Total RNA from *E. coli* or *M. smegmatis* (3–20 µg) was loaded onto a 1.2% (wt/vol) agarose, 2% (vol/vol) formaldehyde gel and visualized by adding ethidium bromide and exposing to UV light. The radiolabeled DNA used for Northern analysis was generated either with a random-primed DNA labeling kit (Roche) from PCR products amplified from 23S and 16S rRNA genes or with oligonucleotides that were 5'-labeled with [<sup>32</sup>P]-ATP using T4 polynucleotide kinase (New England Biolabs).

**In Vivo Primer Extension Analysis.** Total RNA from *E. coli* or *M. smegmatis* (25 or 2.25 µg, respectively) was used in primer extension reactions using a Sequenase version 2.0 DNA sequencing kit (USB) as previously described (3).

**Preparation of Recombinant MazF-mt6 and MazE-mt6.** pColdTF-FT-*mazF-mt6* and pET-28a-*mazE-mt6* BL21(DE3) transformants were used to inoculate 1 L of M9 liquid medium and grown to an OD<sub>600nm</sub> of 0.35 and 0.64, respectively. For pColdTF-FT-*mazF-mt6* BL21(DE3) transformants, the culture was transferred to a 15 °C water bath and incubated for 30 min before the protein was induced with 1 mM isopropyl-β-D-thiogalactopyranoside (IPTG) and expressed for 3 h. pET-28a-*mazE-mt6* BL21(DE3) transformants were induced with 1 mM IPTG and expressed for 3.5 h. Cells were disrupted by sonication, and extracts were purified by nickel-nitrilotriacetic acid affinity chromatography (Qiagen). His<sub>6</sub>-TF-FLAG-MazF-mt6 was cleaved with Factor Xa (New England Biolabs) to excise trigger factor from the target protein. FLAG-MazF-mt6 was further purified over an anti-FLAG resin to remove His<sub>6</sub>-TF.

**RNA Cleavage Activity of MazF-mt6.** Total RNA from *M. smegmatis* strain mc<sup>2</sup>155 harboring pMC1s or *M. tuberculosis* strain H37Rv (4.15 or 3.0 µg, respectively) was used. For antitoxin inhibition of RNA cleavage, 2.0 µM MazE-mt6 was preincubated with 1.0 µM MazF-mt6 for 15 min at room temperature before the RNA substrate was added. RNA was incubated with or without 0.0625, 0.125, 0.25, 0.5, or 1.0 µM MazF-mt6 or 2.0 µM MazE-mt6 in 10 mM Tris-HCl (pH 7.8) for 15 min at 37 °C.

**In Vitro Primer Extension Analysis of *E. coli*, *M. smegmatis*, and *M. tuberculosis* Total RNA.** For mycobacterial experiments, antitoxin rescue was performed as described above, and the same buffer and amounts of total RNA as above were incubated with or without 1.0 µM MazF-mt6 or 2.0 µM MazE-mt6 for 15 min at 37 °C. For *E. coli* experiments, 0.8 µg total RNA was used and cleavage reactions were incubated with or without 1.0 µM MazF-mt6 and with 0, 3, or 10.75 mM MgCl<sub>2</sub> for 30 min at 37 °C. Primer extension analysis was performed as above. Oligonucleotide Myco23S-2 was used for both *M. smegmatis* and *M. tuberculosis* 23S rRNA, because these rRNAs are 100% identical at that 29-nt region. The *M. smegmatis* 23S rRNA PCR product was also used to create a sequencing ladder for *M. tuberculosis*, because the sequence of *M. smegmatis* and *M. tuberculosis* 23S rRNAs are 100% identical for a >160-nt region upstream of the Myco23S-2 primer.

**Ribosome Cleavage Activity of MazF-mt6.** Functional *E. coli* 70S monoribosomes from a PURExpress in vitro protein synthesis kit (New England Biolabs) were incubated at a final concentration of 0.6 µM with or without 6.0, 12.0, or 24.0 µM MazF-mt6 or 12.0 µM MazE-mt6. For antitoxin inhibition of rRNA cleavage, 12.0 µM MazE-mt6 was preincubated with 6.0 µM MazF-mt6 for 15 min at room temperature before the ribosome substrate was added. To assess cleavage of rRNA in 50S and 30S ribosomal subunits vs. rRNA in 70S monosomes, the Mg<sup>2+</sup> concentration was either diluted to a final concentration of 0.75 mM to dissociate 70S monosomes completely or maintained above 10 mM at every step to keep ribosomes intact to a final concentration of 10.75 mM Mg<sup>2+</sup>. Cleavage reactions were incubated with 1 U/µL RNase inhibitor (New England Biolabs) in 10 mM Tris-HCl (pH 7.8) for 30 min or 4 h at 37 °C. rRNA was extracted twice with phenol-chloroform-isoamyl alcohol, extracted once with chloroform, and precipitated with ethanol. Samples were separated by 1.2% (wt/vol) agarose 2% (vol/vol) formaldehyde or 6% (wt/vol) polyacrylamide 7 M urea gel electrophoresis and visualized by

staining with ethidium bromide or SYBR Gold (Invitrogen), respectively.

**Protein Synthesis Activity of MazF-mt6–Cleaved Ribosomes.** Protein synthesis reactions were performed in a PURExpress  $\Delta$ ribosome in vitro protein synthesis kit (New England Biolabs) according to the manufacturer's guidelines. As the manufacturer suggests, total reaction volumes were increased by 20% to allow more experimental flexibility. To give MazF-mt6 an opportunity to cleave rRNA in 50S subunits, the  $Mg^{2+}$  concentration in some reactions was diluted to 3.0 mM to dissociate  $\sim 70\%$  of 70S monosomes (4). The subunits (30 pmol) were then incubated with or without 120 pmol MazF-mt6 for 60 min at 37 °C, and the  $Mg^{2+}$  concentration was increased to 13.6 mM to facilitate ribosome re-association. In the remaining reactions, the  $Mg^{2+}$  concentration was maintained above 10 mM at every step. For all reactions, the final  $Mg^{2+}$  concentration was the recommended 13.0 mM for efficient transcription and translation. Reactions were incubated with 0.8 U/ $\mu$ L RNase inhibitor, 0.33  $\mu$ Ci/ $\mu$ L of [ $^{35}$ S]-Met, and 10 ng/ $\mu$ L of pET-28a-*ompF* or pET-21c-*fhuF*. After adding plasmid DNA to initiate transcription and translation, reactions were incubated for 2 h at 37 °C. Samples were separated by 17.5% (wt/vol) SDS/PAGE and visualized by autoradiography.

**RT-PCR of mRNA from in Vitro Protein Synthesis.** Transcription reactions were performed as for protein synthesis reactions but without [ $^{35}$ S]-Met and with or without 10 ng/ $\mu$ L of pET-28a-*ompF* or pET-21c-*fhuF*. For all transcription reactions, the  $Mg^{2+}$  concentration was lowered to 3.0 mM and raised to 13.6 mM as for protein synthesis reactions. RNA was treated with 1 U (0.067 U/ $\mu$ L) of TURBO DNA-free DNase (Invitrogen) for 30 min at 37 °C according to the suppliers' recommendations, extracted with phenol-chloroform-isoamyl alcohol, and precipitated with ethanol. RT was performed with 20  $\mu$ g of RNA, 5 U/ $\mu$ L of avian myeloblastoma virus reverse transcriptase (New England Biolabs), and 10 U/ $\mu$ L of RNase inhibitor for 60 min at 42 °C. The resulting cDNA was used as a template for PCR, and the reactions were run on a 1% agarose gel and visualized by staining with ethidium bromide.

**Ribosome Profile Analysis.** Polyribosomes were isolated as described previously (3). For each of the three replicates, an equal amount of total RNA—from 8 to 13 OD<sub>260nm</sub> units (320–520  $\mu$ g)—was layered onto a 5–40% (wt/vol) continuous sucrose gradient in polysome profile buffer and centrifuged at 106,000  $\times g$  for 4 h at 4 °C. Gradients were fractionated and analyzed with continuous monitoring at 280 nm. From the resulting profiles, we determined the area of each peak and estimated the percentage of dissociated 50S and 30S subunits by dividing the area of the 50S+30S subunit peaks by the total area of 50S+30S+70S peaks.

**Growth Profiles of *M. smegmatis* and *M. tuberculosis* Cultures Expressing MazF-mt6.** MazF-mt6 was expressed in all *M. smegmatis* strain mc<sup>2</sup>155 and *M. tuberculosis* strain H37Rv liquid cultures from a tetracycline-inducible promoter in pMC1s-*mazF-mt6*. *M. smegmatis* growth was compared with uninoculated cultures harboring pMC1s-*mazF-mt6*, whereas *M. tuberculosis* growth was compared with cultures harboring pMC1s. MazF-mt6 was expressed in *M. smegmatis* cultures with 100 ng/mL anhydrotetracycline but induced in *M. tuberculosis* cultures with 200 ng/mL anhydrotetracycline. For *M. tuberculosis* cultures, anhydrotetracycline was added every 48 h to maintain the concentration between 12.5 and 200 ng/mL. *M. tuberculosis* cultures were inoculated with single colonies from a fresh transformation and supplemented with 30% spent culture supernatant. Spent culture supernatant was prepared from a late logarithmic phase *M. tuberculosis* H37Rv culture (i.e., OD<sub>600nm</sub> of 0.8) by centrifugation at 2,000  $\times g$  for 10 min at 4 °C followed by filtration through a 0.22- $\mu$ m filter (Millipore).

**Statistical Analysis of UUMHU Frequency in *M. tuberculosis* Genes.** All 4,095 annotated noncoding RNA and protein-coding genes from *M. tuberculosis* strain H37RV were retrieved from the TubercuList Web site (<http://tuberculist.epfl.ch/>) on August 17, 2012. These genes were divided into 11 functional categories from the genome annotation (5–7). Six genes—Rv0298, Rv0299, Rv0909, Rv0910, Rv2653c, and Rv2654c—that Cox and coworkers found to be novel functional TA systems (8) were moved into the *virulence, detoxification, and adaptation* category. The Rv2653c and Rv2654c loci were removed from the *insertion sequences and phages* group, whereas the other four genes were removed from the *conserved hypothetical protein* category. The nucleotide composition of each gene was calculated. The probability,  $p$ , of the degenerate MazF-mt6 cleavage motif **UUMHU** (in which M = C or A and H = C, U, or A; i.e., UUCCU, UUCAU, UUCUU, UUACU, UUAUU, or UUAUU) appearing anywhere in an *M. tuberculosis* gene is  $P = (\text{percentage of U})^3 \times [(\text{percentage of C}) + (\text{percentage of A})] \times [1 - (\text{percentage of G})]$ . Let  $L$  be the length of the gene. Then the expected number,  $E$ , of motifs in the gene is  $E = p(L - 4)$ . Let  $K$  be the actual number of motifs in the gene. Then the probability,  $P$ , of having  $K$  or more motifs in the gene is:

$$P = 1 - \sum_{i=0}^{K-1} p^i (1-p)^{L-4-i} \frac{(L-4)!}{i!(L-4-i)!}$$

A gene with a very small  $P$  value suggests that it may have evolved to be susceptible to cleavage by MazF-mt6. Conversely, a gene with a very large  $P$  value suggests that it may have evolved to eliminate the motif from its sequence.

- Zhu L, et al. (2006) Characterization of mRNA interferases from *Mycobacterium tuberculosis*. *J Biol Chem* 281(27):18638–18643.
- Rothenbacher FP, et al. (2012) *Clostridium difficile* MazF toxin exhibits selective, not global, mRNA cleavage. *J Bacteriol* 194(13):3464–3474.
- Sharp JD, et al. (2012) Growth and translation inhibition through sequence-specific RNA binding by *Mycobacterium tuberculosis* VapC toxin. *J Biol Chem* 287(16):12835–12847.
- van Duin J, van Dieijen G, van Knippenberg PH, Bosch L (1970) Different species of 70S ribosomes of *Escherichia coli* and their dissociation into subunits. *Eur J Biochem* 17(3):433–440.
- Cole ST, et al. (1998) Deciphering the biology of *Mycobacterium tuberculosis* from the complete genome sequence. *Nature* 393(6685):537–544.
- Camus JC, Pryor MJ, Médigue C, Cole ST (2002) Re-annotation of the genome sequence of *Mycobacterium tuberculosis* H37Rv. *Microbiology* 148(Pt 10):2967–2973.
- Lew JM, Kapopoulou A, Jones LM, Cole ST (2011) TubercuList—10 years after. *Tuberculosis (Edinb)* 91(1):1–7.
- Ramage HR, Connolly LE, Cox JS (2009) Comprehensive functional analysis of *Mycobacterium tuberculosis* toxin-antitoxin systems: Implications for pathogenesis, stress responses, and evolution. *PLoS Genet* 5(12):e1000767.

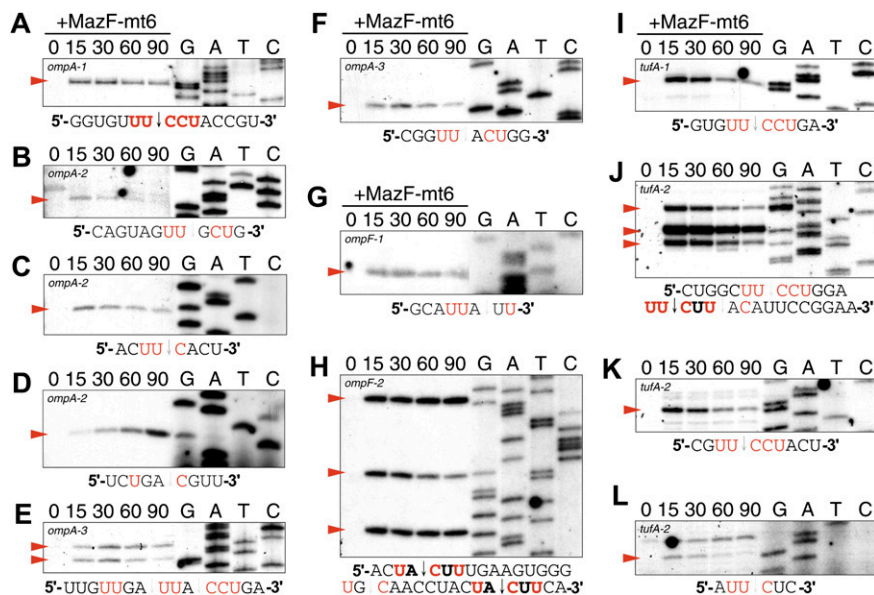

**Fig. S1.** MazF-mt6 expressed in *E. coli* cleaves *ompA*, *ompF*, and *tufA* mRNAs at UUCU sequences. Primer extension analysis of sites in *ompA* (A–F), *ompF* (G and H), and *tufA* (I–L) mRNAs cleaved upon MazF-mt6 expression in *E. coli* strain BW25113Δ6. Numbered lanes indicate time of MazF-mt6 induction (in min), whereas G, A, T, and C lanes denote DNA sequencing ladders. Oligonucleotides used for sequencing and primer extension reactions are listed in the top left corner inside each box. The red arrows on the left indicate the mRNA cleavage site, and the RNA sequence surrounding each cleavage site is listed below. Bold text and black arrows indicate major mRNA cleavage sites, for which the increase in accumulated cleavage products is coupled with a corresponding decrease in the full-length transcript. Regular black text and gray arrows indicate minor cleavage sites, for which the intensity of the cleavage product is much weaker than the full-length transcript, and gray text and arrows are rare cleavage sites, for which the cleavage product is much weaker than minor products.

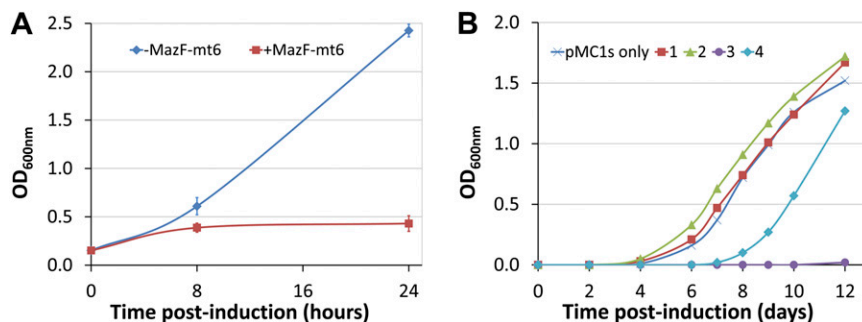

**Fig. S2.** Expression of MazF-mt6 arrests growth of *M. smegmatis* strain mc<sup>2</sup>155 and *M. tuberculosis* strain H37Rv. (A) Growth profile for MazF-mt6 uninduced (blue diamonds) or induced (red squares) in *M. smegmatis* mc<sup>2</sup>155 containing pMC1s-*mazF-mt6*. Data points represent the average of four independent experiments; error bars represent the SD. (B) Growth profile for pMC1s (dark blue x) or four independent cultures of pMC1s-*mazF-mt6* [cultures 1 (red squares), 2 (green triangles), 3 (purple circles), or 4 (blue diamonds)] in *M. tuberculosis* H37Rv. Although expression of MazF-mt6 did not arrest growth in two of four *M. tuberculosis* cultures, its expression potentially arrested growth in the other two cultures for at least 1 wk (colonies 3 and 4). This result suggests that MazF-mt6 is subject to strong selective pressure for intragenic or extragenic suppressor formation, both before induction (colonies 1 and 2) or upon prolonged induction (colony 4).



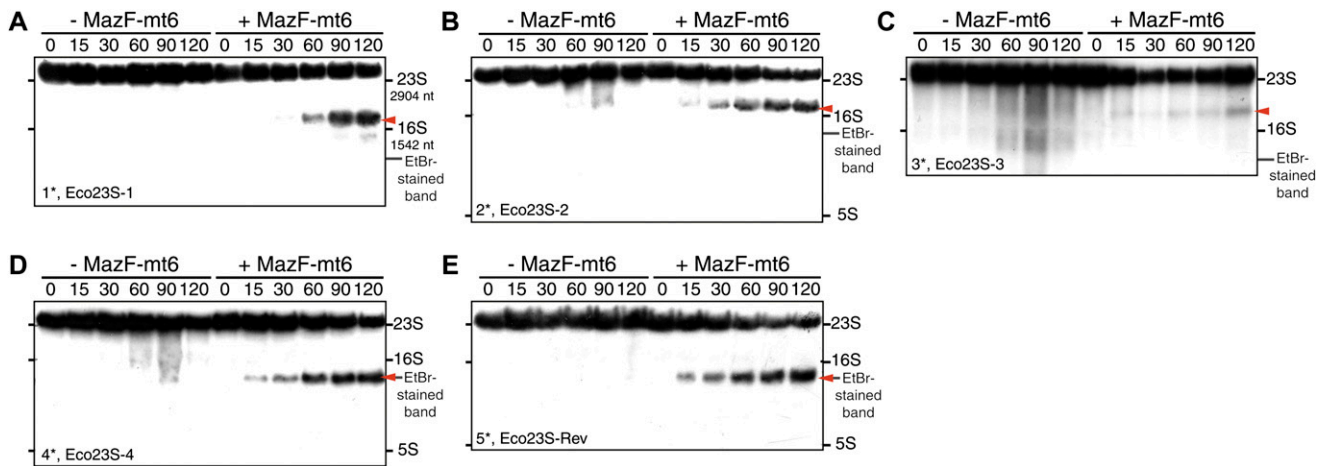

**Fig. 53.** Pattern of MazF-mt6-mediated cleavage in 23S rRNA is consistent with cleavage at  $^{1939}\text{UCCCU}^{1943}$ . (A–E) Northern analysis of total RNA from *E. coli* cells expressing MazF-mt6 (Right) for the times shown (in min), relative to the uninduced control (Left). The radiolabeled DNA fragments were generated from oligonucleotides that were 5'-labeled with [ $^{32}\text{P}$ ]-ATP. These oligonucleotides were designed to detect potential cleavage products at each region between the three UCCCU positions in 23S rRNA, as illustrated in Fig. 2E. Northern blots using each of the following oligonucleotides, from 5' to 3', were (A) 1\* or Eco23S-1, (B) 2\* or Eco23S-2, (C) 3\* or Eco23S-3, (D) 4\* or Eco23S-4, and (E) 5\* or Eco23S-Rev, with each oligonucleotide name at the bottom left corner inside each box as identified in Fig. 2E and Table S4, respectively. All oligonucleotides upstream of  $^{1939}\text{UCCCU}^{1943}$  (A–C) detect a “large” 23S rRNA cleavage fragment that migrates above 16S rRNA, whereas oligonucleotides downstream of that UCCCU site (D and E) detect the “small” 23S rRNA cleavage product that migrates below 16S rRNA and is easily seen on ethidium bromide-stained agarose gels (EtBr-stained band). Red arrows indicate 23S rRNA cleavage products.

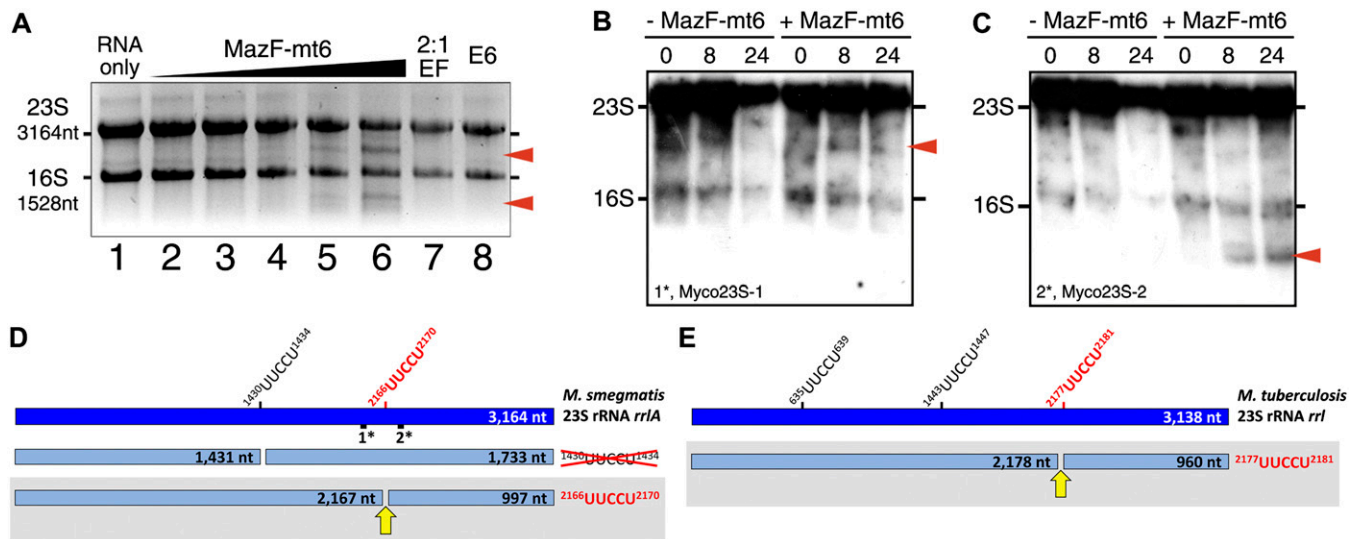

**Fig. 54.** MazF-mt6 also cleaves 23S rRNA in *M. smegmatis* strain  $\Delta rnj$  and *M. tuberculosis*. (A) Incubation of MazF-mt6 with *M. smegmatis* total RNA generates cleavage products (red arrows) similar to those in *E. coli* (Fig. 2A). RNA visualized by ethidium bromide staining. A 2:1 molar ratio of antitoxin to toxin can prevent cleavage by MazF-mt6 (labeled 2:1 E:F, lane 7), whereas MazE-mt6 alone does not cleave RNA (E6, lane 8). (B and C) Northern analysis of 3  $\mu\text{g}$  of total RNA/lane from *M. smegmatis*  $\Delta rnj$  cells expressing MazF-mt6 (Right) for the times shown (in h), relative to the uninduced control (Left). The radiolabeled DNA fragments were generated from oligonucleotides that were 5'-labeled with [ $^{32}\text{P}$ ]-ATP. These oligonucleotides were designed to detect potential cleavage fragments on either the 5' or 3' side of the expected cleavage site  $^{2166}\text{UCCCU}^{2170}$  in *M. smegmatis* 23S rRNA, as illustrated in D. Northern blots using each of the following oligonucleotides, from 5' to 3', were (B) 1\* or Myco23S-1 and (C) 2\* or Myco23S-2, with each oligonucleotide name as identified in D and Table S4, respectively. Oligonucleotide names are at the bottom left corner inside each box. The oligonucleotide upstream of  $^{2166}\text{UCCCU}^{2170}$  (B) detects the “large” 23S rRNA cleavage fragment that migrates above 16S rRNA, whereas the oligonucleotide downstream of that site (C) detects the “small” 23S rRNA cleavage product that migrates below 16S rRNA. Red arrows indicate 23S rRNA cleavage products. (D) Scale schematic of *M. smegmatis* 23S rRNA indicating the positions of the two UCCCU sites and potential cleavage products. Top blue bar, 23S rRNA. 1\* and 2\* represent the positions of the radioactive oligonucleotides used for individual Northern blots in B and C, respectively, to estimate the location of the MazF-mt6 cleavage site. The two lower rows of light blue bars represent the possible cleavage products for each UCCCU. Our Northern data coincided with the cleavage products represented in the bottom row of light blue bars boxed in gray, with the cleavage site shown by a yellow arrow. (E) Scale schematic of *M. tuberculosis* 23S rRNA indicating the positions of the three UCCCU sites. Our primer extension data (Fig. 3D) confirmed  $^{2177}\text{UCCCU}^{2181}$  is the single site cleaved by MazF-mt6.

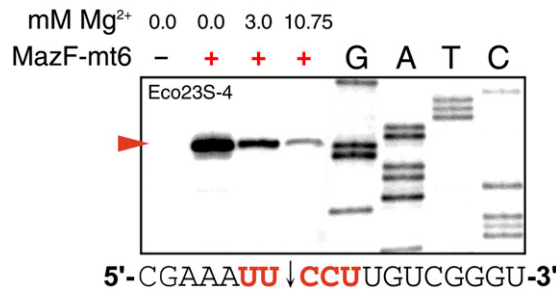

**Fig. S5.** MazF-mt6 cleaves 23S rRNA at 3 mM and 10.75 mM Mg<sup>2+</sup>. Primer extension analysis of the <sup>1939</sup>UCCU<sup>1944</sup> site in 23S rRNA cleaved upon incubation of MazF-mt6 with *E. coli* total RNA in vitro under various Mg<sup>2+</sup> concentrations. Numbered lanes indicate concentration of Mg<sup>2+</sup> (mM), whereas G, A, T, and C lanes denote DNA sequencing ladders. Oligonucleotide used for sequencing and primer extension reactions is listed in the top left corner. Red arrow on the left indicates the rRNA cleavage site, and the RNA sequence surrounding the cleavage site is listed below.

**Table S1. Top 20 MazF-mt6-susceptible genes in *M. tuberculosis* with degenerate UUMHU motif, sorted by *P* value**

| Locus   | Length (nt) | Expected motif count | Actual motif count | <i>P</i> value  | Gene             | Cat # | Functional category                     | Product                                                      |
|---------|-------------|----------------------|--------------------|-----------------|------------------|-------|-----------------------------------------|--------------------------------------------------------------|
| Rv0355c | 9,903       | 19.03                | 38                 | <b>0.000082</b> | <i>PPE8</i>      | 6     | PE/PPE                                  | PPE family protein PPE8                                      |
| Rv1917c | 4,380       | 13.84                | 28                 | <b>0.000525</b> | <i>PPE34</i>     | 6     | PE/PPE                                  | PPE family protein PPE34                                     |
| Rv3841  | 546         | 1.02                 | 6                  | <b>0.000640</b> | <i>bfrB</i>      | 7     | Intermediate metabolism and respiration | Possible bacterioferritin BfrB                               |
| Rv3176c | 957         | 1.50                 | 7                  | <b>0.000931</b> | <i>mesT</i>      | 0     | Virulence, detoxification, adaptation   | Probable epoxide hydrolase MesT                              |
| Rv0279c | 2,514       | 0.76                 | 5                  | <b>0.001131</b> | <i>PE_PGRS4</i>  | 6     | PE/PPE                                  | PE-PGRS family protein PE_PGRS4                              |
| Rv0878c | 1,332       | 2.03                 | 8                  | <b>0.001189</b> | <i>PPE13</i>     | 6     | PE/PPE                                  | PPE family protein PPE13                                     |
| Rv3157  | 1,662       | 4.84                 | 13                 | <b>0.001493</b> | <i>nuoM</i>      | 7     | Intermediate metabolism and respiration | Probable NADH dehydrogenase I NuoK, chain M                  |
| Rv3669  | 519         | 1.76                 | 7                  | <b>0.002201</b> | <i>Rv3669</i>    | 3     | Cell wall & cell processes              | Probable conserved transmembrane protein                     |
| Rv2501c | 1,965       | 2.79                 | 9                  | <b>0.002364</b> | <i>accA1</i>     | 1     | Lipid metabolism                        | Probable acetyl-/propionyl-CoA carboxylase, $\alpha$ subunit |
| Rv0492A | 330         | 0.91                 | 5                  | <b>0.002397</b> | <i>Rv0492A</i>   | 10    | Conserved hypothetical proteins         | Hypothetical protein                                         |
| Rv0297  | 1,776       | 0.55                 | 4                  | <b>0.002407</b> | <i>PE_PGRS5</i>  | 6     | PE/PPE                                  | PE-PGRS family protein PE_PGRS5                              |
| Rv0267  | 1,392       | 4.11                 | 11                 | <b>0.003432</b> | <i>narU</i>      | 3     | Cell wall and cell processes            | Probable integral membrane nitrite extrusion protein         |
| Rv3159c | 1,773       | 3.60                 | 10                 | <b>0.003961</b> | <i>PPE53</i>     | 6     | PE/PPE                                  | PPE family protein PPE53                                     |
| Rv2193  | 612         | 3.05                 | 9                  | <b>0.004115</b> | <i>ctaE</i>      | 7     | Intermediate metabolism and respiration | Probable cytochrome C oxidase (subunit III) CtaE             |
| Rv1625c | 1,332       | 2.49                 | 8                  | <b>0.004136</b> | <i>cya</i>       | 7     | Intermediate metabolism and respiration | Membrane-anchored adenyl cyclase Cya                         |
| Rv0278c | 2,874       | 1.03                 | 5                  | <b>0.004139</b> | <i>PE_PGRS3</i>  | 6     | PE/PPE                                  | PE-PGRS family protein PE_PGRS3                              |
| Rv0456B | 174         | 0.65                 | 4                  | <b>0.004456</b> | <i>mazE2</i>     | 0     | Virulence, detoxification, adaptation   | Possible antitoxin MazE-mt2                                  |
| Rv2707  | 975         | 3.13                 | 9                  | <b>0.004863</b> | <i>Rv2707</i>    | 10    | Conserved hypothetical proteins         | Probable conserved transmembrane protein                     |
| Rv1091  | 2,562       | 0.70                 | 4                  | <b>0.005608</b> | <i>PE_PGRS22</i> | 6     | PE/PPE                                  | PE-PGRS family protein PE_PGRS22                             |
| Rv0304c | 6,615       | 15.00                | 26                 | <b>0.006128</b> | <i>PPE5</i>      | 6     | PE/PPE                                  | PPE family protein PPE5                                      |

The expected number of MazF-mt6 *UUMHU* (i.e., UCCU, UUCAU, UUCU, UUACU, UUAU, or UUAUU) cleavage motifs for each of the 4,095 annotated noncoding RNA and protein-coding genes from *M. tuberculosis* strain H37Rv was calculated according to the length and nucleotide composition of each gene (*SI Materials and Methods*). The probability of the motif appearing anywhere in any gene was determined by comparing the actual number to the expected number of motifs. The Cat. # and Functional category columns refer to the 11 categories from the annotation of the *M. tuberculosis* H37Rv genome sequence, and color-coding for each functional category is similar to that in the TubercuList Web site (<http://tuberculist.epfl.ch/>). The data were sorted by lowest to highest *P* value. *P* values <0.001 are shaded pink with bold black text, whereas *P* values between 0.001 and 0.01 are shaded orange with bold black text.

**Table S2. Top 20 MazF-mt6-susceptible genes in *M. tuberculosis* with degenerate UUMHU motif, sorted by number of actual motifs**

| Locus   | Length (nt) | Expected motif count | Actual motif count | <i>P</i> value  | Gene    | Cat # | Functional category                     | Product                                            |
|---------|-------------|----------------------|--------------------|-----------------|---------|-------|-----------------------------------------|----------------------------------------------------|
| Rv0355c | 9,903       | 19.03                | 38                 | <b>0.000082</b> | PPE8    | 6     | PE/PPE                                  | PPE family protein PPE8                            |
| Rv3350c | 11,151      | 22.31                | 29                 | 0.098299        | PPE56   | 6     | PE/PPE                                  | PPE family protein PE56                            |
| Rv3343c | 7,572       | 24.56                | 29                 | 0.208947        | PPE54   | 6     | PE/PPE                                  | PPE family protein PPE54                           |
| Rv1917c | 4,380       | 13.84                | 28                 | <b>0.000525</b> | PPE34   | 6     | PE/PPE                                  | PPE family protein PPE34                           |
| Rv0304c | 6,615       | 15.00                | 26                 | <b>0.006128</b> | PPE5    | 6     | PE/PPE                                  | PPE family protein PPE5                            |
| Rv3347c | 9,474       | 21.27                | 20                 | 0.637919        | PPE55   | 6     | PE/PPE                                  | PPE family protein PPE55                           |
| Rv0405  | 4,209       | 15.19                | 16                 | 0.451214        | pks6    | 1     | Lipid metabolism                        | Probable membrane-bound polyketide synthase Pks6   |
| Rv3239c | 3,147       | 7.19                 | 15                 | <b>0.007097</b> | Rv3239c | 3     | Cell wall and cell processes            | Probable conserved transmembrane transport protein |
| Rv2380c | 5,049       | 8.40                 | 15                 | 0.024986        | mbtE    | 1     | Lipid metabolism                        | Peptide synthetase MbtE                            |
| Rv0101  | 7,539       | 15.05                | 15                 | 0.539631        | nrp     | 1     | Lipid metabolism                        | Probable peptide synthetase Nrp                    |
| Rv2048c | 12,456      | 23.25                | 15                 | 0.972223        | pks12   | 1     | Lipid metabolism                        | Polyketide synthase Pks12                          |
| Rv2940c | 6,336       | 10.65                | 14                 | 0.186882        | mas     | 1     | Lipid metabolism                        | Probable multifunctional mycocerosic acid synthase |
| Rv3157  | 1,662       | 4.84                 | 13                 | <b>0.001493</b> | nuoM    | 7     | Intermediate metabolism and respiration | Probable NADH dehydrogenase I NuoK, chain M        |
| Rv0987  | 2,568       | 15.15                | 13                 | 0.745257        | Rv0987  | 3     | Cell wall and cell processes            | Probable adhesion component ABC transporter        |
| Rv1623c | 1,458       | 5.20                 | 12                 | <b>0.007212</b> | cydA    | 7     | Intermediate metabolism and respiration | Probable cytochrome D ubiquinol oxidase, subunit I |
| Rv3795  | 3,297       | 6.45                 | 12                 | 0.032027        | embB    | 3     | Cell wall and cell processes            | Integral membrane indolylacetyltransferase EmbB    |
| Rv3063  | 2,277       | 6.72                 | 12                 | 0.041298        | cstA    | 0     | Virulence, detoxification, adaptation   | Probable carbon starvation protein a homolog CstA  |
| Rv3043c | 1,722       | 7.45                 | 12                 | 0.075820        | ctaD    | 7     | Intermediate metabolism and respiration | Probable cytochrome c oxidase polypeptide I CtaD   |
| Rv2946c | 4,851       | 8.39                 | 12                 | 0.142118        | pks1    | 1     | Lipid metabolism                        | Probable polyketide synthase Pks1                  |
| Rv2524c | 9,210       | 11.05                | 12                 | 0.426907        | fas     | 1     | Lipid metabolism                        | Probable fatty acid synthase Fas                   |

The expected number of MazF-mt6 *UUMHU* (i.e., UUCU, UUCAU, UUCUU, UUACU, UUAUU, or UUAUU) cleavage motifs for each of the 4,095 annotated noncoding RNA and protein-coding genes from *M. tuberculosis* strain H37Rv was calculated based on the length and nucleotide composition of each gene (See Materials and Methods). The probability of the motif appearing anywhere in any gene was determined by comparing the actual number to the expected number of motifs. The *Cat. #* and *Functional category* columns refer to the 11 categories from the annotation of the *M. tuberculosis* H37Rv genome sequence, and color-coding for each functional category is similar to that in the TubercuList Web site (<http://tuberculist.epfl.ch/>). The data were sorted from highest to lowest number of actual motifs. *P* values <0.001 are shaded pink with bold black text, whereas *P* values between 0.001 and 0.01 are shaded orange with bold black text, and *P* values between 0.01 and 0.05 are shaded yellow with regular black text.

**Table S3. Strains and plasmids used in this study**

| Bacterial strain/plasmid                                               | Purpose                          | Genotype                                                                                                                                                                                                                                                                                                                             | Source                        |
|------------------------------------------------------------------------|----------------------------------|--------------------------------------------------------------------------------------------------------------------------------------------------------------------------------------------------------------------------------------------------------------------------------------------------------------------------------------|-------------------------------|
| Bacterial strain, <i>E. coli</i><br>DH5 $\alpha$                       | Cloning                          | F <sup>-</sup> $\phi$ 80d/lacZ $\Delta$ M15 $\Delta$ (lacZYA-argF)U169<br>deoR recA1 endA1 hsdR17(rK <sup>-</sup> , mK <sup>+</sup> )<br>phoA supE44 $\lambda$ <sup>-</sup> thi-1 gyrA96 relA1                                                                                                                                       | Takara Bio Inc.               |
| BL21(DE3)<br>BW25113 $\Delta$ 6                                        | EXP<br>TX, NB, PE                | F <sup>-</sup> ompT hsdS $\beta$ (r $\beta$ -m $\beta$ ) dcm gal (DE3) tonA<br>lacI <sup>q</sup> rrnB <sub>T14</sub> $\Delta$ lac-Z <sub>WJ16</sub> hsdR514 $\Delta$ araBAD <sub>AH33</sub><br>$\Delta$ rhaBAD <sub>LD78</sub> $\Delta$ chpBIK $\Delta$ dinJ-yafQ $\Delta$ hipBA<br>$\Delta$ mazEF $\Delta$ relBE $\Delta$ yefM-yoeB | Novagen<br>(1)                |
| Bacterial strain, <i>M. smegmatis</i><br>mc <sup>2</sup> 155<br>rnj102 | TX, NB, PE, CA<br>NB, PE         | Wild-type<br>$\Delta$ rnj (MSMEG_2685 locus)                                                                                                                                                                                                                                                                                         | ATCC<br>(2)                   |
| Bacterial strain, <i>M. tuberculosis</i><br>H37Rv                      | TX, CA                           | Wild-type                                                                                                                                                                                                                                                                                                                            | ATCC                          |
| Plasmid, <i>E. coli</i><br>pET-21c                                     | In vitro translation;<br>cloning |                                                                                                                                                                                                                                                                                                                                      | Novagen                       |
| pET-28a                                                                | EXP; in vitro translation        |                                                                                                                                                                                                                                                                                                                                      | Novagen                       |
| pBAD33                                                                 | TX                               |                                                                                                                                                                                                                                                                                                                                      | ATCC                          |
| pColdTF-FT                                                             | EXP                              |                                                                                                                                                                                                                                                                                                                                      | pColdTF, Takara Bio Inc.; (3) |
| pET-21c-mazF-mt6                                                       | Cloning                          |                                                                                                                                                                                                                                                                                                                                      | (4)                           |
| pBAD33-mazF-mt6                                                        | TX                               |                                                                                                                                                                                                                                                                                                                                      | (4)                           |
| pColdTF-FT-mazF-mt6                                                    | EXP                              |                                                                                                                                                                                                                                                                                                                                      | This study                    |
| pET-28a-mazE-mt6                                                       | EXP                              |                                                                                                                                                                                                                                                                                                                                      | This study                    |
| pET-28a-ompF                                                           | In vitro translation             |                                                                                                                                                                                                                                                                                                                                      | This study                    |
| pET-21c-fhuF                                                           | In vitro translation             |                                                                                                                                                                                                                                                                                                                                      | This study                    |
| Plasmid, <i>E. coli</i> -mycobacteria<br>shuttle vectors               |                                  |                                                                                                                                                                                                                                                                                                                                      |                               |
| pMC1s                                                                  | TX                               |                                                                                                                                                                                                                                                                                                                                      | ATCC                          |
| pMC1s-mazF-mt6                                                         | TX                               |                                                                                                                                                                                                                                                                                                                                      | This study                    |

EXP, protein expression; TX, toxicity; NB, Northern blot; PE, primer extension; CA, in vitro RNA cleavage assay.

1. Prysak MH, et al. (2009) Bacterial toxin YafQ is an endoribonuclease that associates with the ribosome and blocks translation elongation through sequence-specific and frame-dependent mRNA cleavage. *Mol Microbiol* 71(5):1071–1087.
2. Taverniti V, Forti F, Ghisotti D, Putzer H (2011) *Mycobacterium smegmatis* RNase J is a 5'-3' exo-endoribonuclease and both RNase J and RNase E are involved in ribosomal RNA maturation. *Mol Microbiol* 82(5):1260–1276.
3. Rothenbacher FP, et al. (2012) *Clostridium difficile* MazF toxin exhibits selective, not global, mRNA cleavage. *J Bacteriol* 194(13):3464–3474.
4. Zhu L, et al. (2006) Characterization of mRNA interferases from *Mycobacterium tuberculosis*. *J Biol Chem* 281(27):18638–18643.

**Table S4. Oligonucleotides used in this study**

| Primer name          | Gene            | Purpose | DNA sequence                                      |
|----------------------|-----------------|---------|---------------------------------------------------|
| <i>E. coli</i> genes |                 |         |                                                   |
| <i>ompA-1</i>        | <i>ompA</i>     | PE      | 5'-CAGGGTTGCTTTGTTGAAGTTGAACAG-3'                 |
| <i>ompA-2</i>        | <i>ompA</i>     | PE      | 5'-CAGAGCAGCCTGACCTTC-3'                          |
| <i>ompA-3</i>        | <i>ompA</i>     | PE      | 5'-TTAAGCTCGGGCTGAGTTACAACGTCCTTTGATACC-3'        |
| <i>ompF-1</i>        | <i>ompF</i>     | PE      | 5'-AAACCAAGACGGGCATAGGTC-3'                       |
| <i>ompF-2</i>        | <i>ompF</i>     | PE      | 5'-TTAGAACTGGTAAACGATACCCACAGC-3'                 |
| <i>ompF-Fwd1</i>     | <i>ompF</i>     | PCR     | 5'-ATGATGAAGCGCAATATTCTGGCAGTG-3'                 |
| <i>ompF-Fwd2</i>     | <i>ompF</i>     | RT-PCR  | 5'-CTTTGGTATCGTTGGTGCTTATGGTGC-3'                 |
| <i>ompF-Rev</i>      | <i>ompF</i>     | RT, PCR | 5'-TTAGAACTGGTAAACGATACCCACAGC-3'                 |
| <i>tufA-1</i>        | <i>tufA</i>     | PE      | 5'-GGGAAGTCGTAAGTACTGAGACAG-3'                    |
| <i>tufA-2</i>        | <i>tufA</i>     | PE      | 5'-CAACTTTGATGATACCGCGTTCTACACG-3'                |
| Eco235-Fwd           | 23S rRNA        | PCR     | 5'-GGTTAAGCGACTAAGCGTACACGG-3'                    |
| Eco235-Rev           | 23S rRNA        | PCR, NB | 5'-AAGGTTAAGCCTCACGGTTCATTAGTACC-3'               |
| Eco235-1             | 23S rRNA        | NB      | 5'-CGTCCTTCATCGCCTCTGACTG-3'                      |
| Eco235-2             | 23S rRNA        | NB      | 5'-CTGTTTCCCATCGACTACGCCTTTC-3'                   |
| Eco235-3             | 23S rRNA        | NB      | 5'-CCGTATACGTCCACTTTCGTGTTTGC-3'                  |
| Eco235-4             | 23S rRNA        | NB, PE  | 5'-CACTGCATCTTCACAGCGAGTTC AATTC-3'               |
| <i>fhuF-Fwd1</i>     | <i>fhuF</i>     | PCR     | 5'-GGAATTC <b>CATATG</b> CGCCTATCGTCCGCACC-3'     |
| <i>fhuF-Rev1</i>     | <i>fhuF</i>     | PCR     | 5'- <b>CGGAATTC</b> ATTTTCAGCGTACAATCGCCACATTG-3' |
| <i>fhuF-Fwd2</i>     | <i>fhuF</i>     | RT-PCR  | 5'-CACTATGGGCACAAATGGTATATCGGC-3'                 |
| <i>fhuF-Rev2</i>     | <i>fhuF</i>     | RT, PCR | 5'-GATAACGCTGGCAGCAAGTGGC-3'                      |
| Mycobacteria genes   |                 |         |                                                   |
| Msmeg235-Fwd         | 23S rRNA        | PCR     | 5'-TTGTAAGTGTTTAAAGGGCGCATGGTG-3'                 |
| Msmeg235-Rev         | 23S rRNA        | PCR     | 5'-GGTGCCTCAATGTTTTCTTCTTACAACGATTATG-3'          |
| Myc235-1             | 23S rRNA        | NB      | 5'-CGTATACATCGTCTTGCGACTTCGC-3'                   |
| Myc235-2             | 23S rRNA        | NB, PE  | 5'-CGAGCATCTTTACTCGTAGTGCAATTCG-3'                |
| Rv1103c-Fwd          | <i>mazE-mt6</i> | PCR     | 5'-GGAATTC <b>CATATG</b> TACCTACCTGGGGGGTTCG-3'   |
| Rv1103c-Rev          | <i>mazE-mt6</i> | PCR     | 5'- <b>CGGGATC</b> CCTCAGTCGATGTCGAGGGCGGTAC-3'   |
| Rv1102c-Fwd          | <i>mazF-mt6</i> | PCR     | 5'-GGAATTC <b>CATATG</b> CGACCTATCCACATCGC-3'     |
| Rv1102c-Rev          | <i>mazF-mt6</i> | PCR     | 5'- <b>CGGGATC</b> CCTATGCCACCACCAATCGAGG-3'      |

NdeI (**CATATG**), EcoRI (**GAATTC**), and BamHI (**GGATCC**) restriction sites within oligonucleotide DNA sequences are **bolded** and underlined. NB, Northern blot; PE, primer extension.
